# Supplementary material for: Integration of longitudinal deep-radiomics and clinical data improves the prediction of durable benefits to anti-PD-1/PD-L1 immunotherapy in advanced NSCLC patients
Source: Springer Nature journal article supplement (doi:10.1186/s12967-023-04004-x), 2023-03-05
Supplement: MOESM1 [file 24098130]

## Supplementary Material

### S1. Train-test split

| PFS6                      | Train set       |              |                     | Test set        |              |                     |
|---------------------------|-----------------|--------------|---------------------|-----------------|--------------|---------------------|
|                           | RF-<br>baseline | RF-<br>delta | RF-<br>longitudinal | RF-<br>baseline | RF-<br>delta | RF-<br>longitudinal |
| Only clinical data        | 221             | 114          | 167                 | 43              | 21           | 33                  |
| Only imaging data         | 128             | 96           | 109                 | 43              | 36           | 40                  |
| Clinical and imaging data | 128             | -            | 92                  | 43              | -            | 32                  |

Supplementary Table S1 Number of patients in the training and independent test set for each model considering the endpoint PFS6.

| PFS9                      | Train set       |              |                     | Test set        |              |                     |
|---------------------------|-----------------|--------------|---------------------|-----------------|--------------|---------------------|
|                           | RF-<br>baseline | RF-<br>delta | RF-<br>longitudinal | RF-<br>baseline | RF-<br>delta | RF-<br>longitudinal |
| Only clinical data        | 216             | 112          | 163                 | 43              | 21           | 33                  |
| Only imaging data         | 125             | 93           | 106                 | 43              | 36           | 40                  |
| Clinical and imaging data | 125             | -            | 90                  | 43              | -            | 32                  |

Supplementary Table S2 Number of patients in the training and independent test set for each model considering the endpoint PFS9.

### S2. Imaging metadata

All CT images were acquired after contrast injection during a patient inspiratory breath hold, following the contrast-enhanced CT chest protocol.

| Metadata               | Value range                                     | FJD                         | CUN                                    |
|------------------------|-------------------------------------------------|-----------------------------|----------------------------------------|
| Manufacturer           | [Siemens, Toshiba, GE Medical Systems, Philips] | [Siemens, Toshiba, Philips] | [Siemens, Toshiba, GE Medical Systems] |
| kVp                    | [80, 140]                                       | [80, 140]                   | [80, 140]                              |
| Current tube           | [48, 1481]                                      | [60, 1481]                  | [48, 998]                              |
| Pixel Spacing          | [0.359, 1.523]                                  | [0.359, 0.975]              | [0.525, 1.523]                         |
| <i>Slice thickness</i> | [0.625, 5.0]                                    | [0.900, 3.0]                | [0.625, 5.0]                           |

Supplementary Table S3 CT image acquisition and reconstruction parameters for the two institutions involved in the study: FJD and CUN.

### S3. Radiomics Reproducibility Analysis

Many studies have shown evidence that radiomics features are influenced by image

acquisition parameters and image segmentation. For this reason, we performed a reproducibility analysis to select only stable features with respect to image acquisition parameters and changes in segmentations.

Feature repeatability against segmentation was verified using: the QIN Lung CT Segmentation dataset [1] and a random subset of the immunotherapy dataset. In the first case, two automatic segmentations with two different algorithms for each nodule were considered. In the second case, an experienced radiologist refined two segmentations of the same nodule obtained with two different modules of syngo.via software. A total of 56 nodules were analyzed.

Feature reproducibility was assessed through a test-retest analysis using the Reference Image Database to Evaluate Therapy Response (RIDER) dataset [2]. The dataset included 31 patients who underwent two chest CT scans, acquired 15 minutes apart with the same image protocol.

Lin's concordance correlation coefficient (CCC) was used to assess feature repeatability and reproducibility. Features presenting a high CCC ( $\geq 0.85$ ) for both tests were considered stable and used for further analysis.

|                 | <b>N features</b> | <b>N stable features</b> |
|-----------------|-------------------|--------------------------|
| Repeatability   | 1365              | 189 (15%)                |
| Reproducibility | 1365              | 914 (68%)                |
| Total Stable    | 1365              | 173 (13%)                |

Supplementary Table S4 Results of the feature repeatability against segmentation and feature reproducibility.

#### **S4. Characterization Dataset**

In addition to the immunotherapy dataset, a dataset was considered to train a deep learning model on nodule characteristics for feature extraction. Benign and confirmed malignant nodules were collected from 719 patients of The Lung Image Database Consortium and Image Database Resource Initiation Data Set (LIDC-IDRI), which consists of annotated chest CT scans for lung cancer screening. Fourteen patients who did not meet the inclusion criteria of the immunotherapy dataset were also added to this collection for a total of 733 patients. Their nodules were all malignant. Given that each patient may have more than one nodule, the characterization dataset contained 1,528 nodules, 1024 of which were benign and 504 malignant.

#### **S5. Clinical data**

Clinical data were extracted from patient electronic medical records and blood tests before and throughout treatment. The electronic medical record was searched to retrieve information about demographics, tumor histology, smoking habits, stage of disease, presence of metastases per site prior to the treatment, excess postexercise oxygen consumption (EPOC), etc. Hematology data were obtained from the blood test performed after the second and third cycles of immunotherapy. They included: platelets, lymphocytes, monocytes, eosinophils, hemoglobin, Neutrophil absolute count (NT), Neutrophil-to-lymphocyte ratio (NLR), Monocyte-to-lymphocyte ratio (MLR), Platelet-to-lymphocyte ratio (PLR), Systemic immune-inflammation index (SII).

## Clinical variables

| Categorical variables | Continuous variables                         | Formula                                                                                     |
|-----------------------|----------------------------------------------|---------------------------------------------------------------------------------------------|
| Sex                   | Platelets (cells/microL)                     |                                                                                             |
| Age                   | Lymphocytes (cells/microL)                   |                                                                                             |
| Weight                | Monocytes (cells/microL)                     |                                                                                             |
| Height                | Eosinophils (cells/microL)                   |                                                                                             |
| BMI                   | Hemoglobin (Hb, g/dL)                        |                                                                                             |
| Surgery               | Neutrophil absolute count (NT, cells/microL) |                                                                                             |
| Smoking               | Neutrophil-to-lymphocyte ratio (NLR)         |                                                                                             |
| Tumour histology      | Monocyte-to-lymphocyte ratio (MLR)           |                                                                                             |
| Steroids              | Platelet-to-lymphocyte ratio (PLR)           |                                                                                             |
| Antibiotics           | Systemic immune-inflammation index (SII)     | $\frac{\text{platelets} \times \text{neutrophils}}{\text{lymphocytes}}$<br>(cells/ $\mu$ L) |
| EPOC                  |                                              |                                                                                             |
| SNC_Metastases        |                                              |                                                                                             |
| Adrenal_Metastases    |                                              |                                                                                             |
| Liver_Metastases      |                                              |                                                                                             |
| Bone_Metastases       |                                              |                                                                                             |

Supplementary Table S5 Clinical variables used for the implementation of the clinical models.

## S6. Demographic and clinical characteristics: patients with image data

| Characteristic             | All Patients<br>(N = 171) | Train set<br>(N = 128) | Test set<br>(N = 43) | p-value |
|----------------------------|---------------------------|------------------------|----------------------|---------|
| <b>PFS, mean (SD)</b>      | 8.8 (10.3)                | 9.2 (10.9)             | 7.6 (8.1)            | 0.289   |
| <b>OS, mean (SD)</b>       | 13.0 (11.3)               | 12.8 (11.6)            | 13.5 (10.5)          | 0.728   |
| <b>Status</b>              |                           |                        |                      |         |
| Alive                      | 68 (39.8%)                | 52 (40.6%)             | 16 (37.2)            | 0.829   |
| Dead                       | 103 (60.2%)               | 76 (59.4%)             | 27 (62.8)            |         |
| <b>Response</b>            |                           |                        |                      |         |
| Non-responders             | 94 (55.0%)                | 70 (54.7%)             | 24 (55.8 %)          | 1.000   |
| Responders                 | 77 (45.0%)                | 58 (45.3%)             | 19 (44.2%)           |         |
| <b>Progression</b>         |                           |                        |                      |         |
| No progression             | 28 (16.4%)                | 23 (18.0%)             | 5 (11.6%)            | 0.463   |
| Progression                | 143 (83.6%)               | 105 (82.0%)            | 38 (88.4%)           |         |
| <b>Age, median [Q1,Q3]</b> | 67.0 [60.0,72.0]          | 66.0 [57.8,71.2]       | 67.0 [60.5,72.5]     | 0.529   |
| <b>Sex</b>                 |                           |                        |                      |         |
| Female                     | 56 (32.7%)                | 42 (32.8%)             | 14 (32.6%)           | 1.000   |
| Male                       | 115 (67.3%)               | 86 (67.2%)             | 29 (67.4%)           |         |
| <b>IPA, mean (SD)</b>      | 45.1 (33.0)               | 45.0 (33.6)            | 45.4 (31.5)          | 0.948   |
| <b>Smoking</b>             |                           |                        |                      |         |
| Current smoker             | 31 (18.2%)                | 26 (20.3%)             | 5 (11.9%)            | 0.465   |
| Former smoker              | 125 (73.5%)               | 92 (71.9%)             | 33 (78.6%)           |         |
| Non-smoker                 | 14(8.2%)                  | 10 (7.8%)              | 4 (9.5%)             |         |

| <b>Tumour Histology</b>       |             |             |            |       |
|-------------------------------|-------------|-------------|------------|-------|
| Adenocarcinoma                | 129 (75.4%) | 96 (75.0%)  | 33 (76.7%) | 0.886 |
| Epidermoid carcinoma          | 36 (21.1%)  | 27 (21.1%)  | 9 (20.9%)  |       |
| Other                         | 6 (3.5%)    | 5 (3.9%)    | 1 (2.3%)   |       |
| <b>PDL1, mean (SD)</b>        | 0.4 (0.4)   | 0.4 (0.4)   | 0.4 (0.4)  | 0.817 |
| <b>Surgery</b>                |             |             |            |       |
| No                            | 146 (85.4%) | 109 (85.2%) | 37 (86.0%) | 1.000 |
| Yes                           | 25 (14.6%)  | 19 (14.8%)  | 6 (14.0%)  |       |
| <b>Treatment</b>              |             |             |            |       |
| Combined Immunological Agents | 26 (15.2%)  | 16 (12.5%)  | 10 (23.3%) | 0.289 |
| Immunotherapy+Chemotherapy    | 30 (17.5%)  | 21 (16.4%)  | 9 (20.9%)  |       |
| Immunotherapy+Radiotherapy    | 15 (8.8%)   | 13 (10.2%)  | 2 (4.7%)   |       |
| Monotherapy                   | 98 (57.3%)  | 76 (59.4%)  | 22 (51.2%) |       |
| Other                         | 2 (1.2%)    | 2 (1.6%)    |            |       |

**Supplementary Table S6** Demographic and clinical characteristics of the patients in the baseline analysis with imaging data. P-values of no significant difference analysis (p-value > 0.05) between the training and test set after two samples T-test for continuous variables, and Chi-square test for categorical variables. SD represents the standard deviation, and Q1 and Q3 represent the first and third quartiles, respectively.

| Characteristic             | All Patients<br>(N = 149) | Train set<br>(N = 109) | Test set<br>(N = 40) | P-Value |
|----------------------------|---------------------------|------------------------|----------------------|---------|
| <b>PFS, mean (SD)</b>      | 9.7 (10.7)                | 10.4 (11.4)            | 7.9 (8.3)            | 0.147   |
| <b>OS, mean (SD)</b>       | 14.4 (11.4)               | 14.5 (11.8)            | 14.1 (10.5)          | 0.842   |
| <b>Status</b>              |                           |                        |                      |         |
| Alive                      | 64 (43.0%)                | 49 (45.0%)             | 15 (37.5%)           | 0.530   |
| Dead                       | 85 (57.0%)                | 60 (55.0%)             | 25 (62.5%)           |         |
| <b>Response</b>            |                           |                        |                      |         |
| Non-responders             | 74 (49.7%)                | 52 (47.7%)             | 22 (55.0%)           | 0.546   |
| Responders                 | 75 (50.3%)                | 57 (52.3%)             | 18 (45.0%)           |         |
| <b>Progression</b>         |                           |                        |                      |         |
| No progression             | 28 (18.8%)                | 23 (21.1%)             | 5 (12.5%)            | 0.340   |
| Progression                | 121 (81.2%)               | 86 (78.9%)             | 35 (87.5%)           |         |
| <b>Age, median [Q1,Q3]</b> | 65.0 [59.0,71.0]          | 65.0 [57.0,71.0]       | 65.5 [60.0,71.2]     | 0.622   |
| <b>Sex</b>                 |                           |                        |                      |         |
| Female                     | 48 (32.2%)                | 34 (31.2%)             | 14 (35.0%)           | 0.808   |
| Male                       | 101 (67.8%)               | 75 (68.8%)             | 26 (65.0%)           |         |
| <b>IPA, mean (SD)</b>      | 45.5 (32.4)               | 45.4 (32.7)            | 45.9 (31.7)          | 0.928   |
| <b>Smoking</b>             |                           |                        |                      |         |
| Current smoker             | 26 (17.6%)                | 21 (19.3%)             | 5 (12.8%)            | 0.662   |
| Former smoker              | 111 (75.0%)               | 80 (73.4%)             | 31 (79.5%)           |         |
| Non-smoker                 | 11 (7.4%)                 | 8 (7.3%)               | 3 (7.7%)             |         |
| <b>Tumour Histology</b>    |                           |                        |                      |         |

|                               |             |            |            |       |
|-------------------------------|-------------|------------|------------|-------|
| Adenocarcinoma                | 112 (75.2%) | 81 (74.3%) | 31 (77.5%) | 0.830 |
| Epidermoid carcinoma          | 31 (20.8%)  | 23 (21.1%) | 8 (20.0%)  |       |
| Other                         | 6 (4.0%)    | 5 (4.6%)   | 1 (2.5%)   |       |
| <b>PDL1, mean (SD)</b>        | 0.4 (0.4)   | 0.4 (0.4)  | 0.4 (0.4)  | 0.598 |
| <b>Surgery</b>                |             |            |            |       |
| No                            | 127 (85.2%) | 93 (85.3%) | 34 (85.0%) | 1.000 |
| Yes                           | 22 (14.8%)  | 16 (14.7%) | 6 (15.0%)  |       |
| <b>Treatment</b>              |             |            |            |       |
| Combined Immunological Agents | 25 (16.8%)  | 16 (14.7%) | 9 (22.5%)  | 0.551 |
| Immunotherapy+Chemotherapy    | 30 (20.1%)  | 21 (19.3%) | 9 (22.5%)  |       |
| Immunotherapy+Radiotherapy    | 15 (10.1%)  | 13 (11.9%) | 2 (5.0%)   |       |
| Monotherapy                   | 78 (52.3%)  | 58 (53.2%) | 20 (50.0%) |       |
| Other                         | 1 (0.7%)    | 1 (0.9%)   | 0(0%)      |       |

**Supplementary Table S7** Demographic and clinical characteristics of the patients in the longitudinal analysis with imaging data. P-values of no significant difference analysis (p-value > 0.05) between the training and test set after two samples T-test for continuous variables, and Chi-square test for categorical variables. SD represents the standard deviation, and Q1 and Q3 represent the first and third quartiles, respectively.

## S7. Number of features selected for each model

|                 |                     |                        | <b>PFS6</b>       | <b>PFS9</b>       |
|-----------------|---------------------|------------------------|-------------------|-------------------|
| <b>Model</b>    | <b>Feature type</b> | <b>N features</b>      | <b>N selected</b> | <b>N selected</b> |
| RF-baseline     | Radiomics           | 173                    | 32                | 91                |
| RF-delta        | Radiomics           | 173                    | 110               | 109               |
| RF-longitudinal | Radiomics           | 173 * 3 time steps     | 235               | 174               |
| RF-baseline     | DF-imm              | 500                    | 31                | 32                |
| RF-delta        | DF-imm              | 500                    | 368               | 214               |
| RF-longitudinal | DF-imm              | 500 * 3 time steps     | 50                | 137               |
| RF-baseline     | Clinical data       | 27                     | 21                | 27                |
| RF-delta        | Clinical data       | 27                     | 26                | 27                |
| RF-longitudinal | Clinical data       | 15 + 12 * 3 time steps | 9                 | 48                |

**Supplementary Table S8** Number of features selected for each RF model. Longitudinal models had as input the concatenation of features extracted from baseline, 1st and 2nd follow-up data (n time steps = 3). In the case of clinical models, only 12 variables had continuous values.

## S8. Results of the implemented models in the training set

| PFS6            |       |               |         |               | PFS9    |               |
|-----------------|-------|---------------|---------|---------------|---------|---------------|
| Model           | Split | Features      | N train | CV Mean AUC   | N train | CV Mean AUC   |
| RF-baseline     | Train | Radiomics     | 128     | 0.635 ± 0.014 | 125     | 0.791 ± 0.058 |
| RF-delta        | Train | Radiomics     | 96      | 0.766±0.040   | 93      | 0.790 ± 0.001 |
| RF-longitudinal | Train | Radiomics     | 109     | 0.656 ± 0.116 | 106     | 0.807 ± 0.046 |
| RF-baseline     | Train | DF-imm        | 128     | 0.668 ± 0.052 | 125     | 0.837 ± 0.051 |
| RF-delta        | Train | DF-imm        | 96      | 0.689±0.128   | 93      | 0.829 ± 0.030 |
| RF-longitudinal | Train | DF-imm        | 109     | 0.710 ± 0.113 | 106     | 0.802 ± 0.077 |
| RF-baseline     | Train | Clinical data | 221     | 0.700 ± 0.050 | 216     | 0.835 ± 0.032 |
| RF-delta        | Train | Clinical data | 114     | 0.593 ± 0.071 | 112     | 0.744 ± 0.067 |
| RF-longitudinal | Train | Clinical data | 167     | 0.731 ± 0.030 | 163     | 0.796 ± 0.044 |

**Supplementary Table S9** Results of the implemented models in the training set for PFS6 and PFS9. The results are presented in terms of the area under the curve ROC curve (AUC) for the 3-fold cross validation.

### S9. Comparisons RF models with radiomics and clinical data

| Model                    | Features                | N test | AUC                           | ACC                           | SENS                        | SPEC                          | PREC                          | bACC                          |
|--------------------------|-------------------------|--------|-------------------------------|-------------------------------|-----------------------------|-------------------------------|-------------------------------|-------------------------------|
| RF-baseline              | Clinical data           | 43     | 0.667<br>[0.485,0.833]        | 0.651<br>[0.512,0.791]        | 0.833<br>[0.667,0.962]      | 0.421<br>[0.2,0.65]           | 0.645<br>[0.48,0.812]         | 0.627<br>[0.488,0.774]        |
| RF-baseline              | DF-imm                  | 43     | 0.588<br>[0.409,0.767]        | 0.558<br>[0.419,0.698]        | 0.833<br>[0.679,0.96]       | 0.211<br>[0.05,0.417]         | 0.571<br>[0.406,0.735]        | 0.522<br>[0.403,0.638]        |
| RF-longitudinal          | Clinical data           | 32     | 0.586<br>[0.413,0.753]        | 0.594<br>[0.406,0.750]        | 0.467<br>[0.200,0.733]      | 0.706<br>[0.467,0.909]        | 0.583<br>[0.300,0.867]        | 0.586<br>[0.417,0.75]         |
| RF-longitudinal          | DF-imm                  | 32     | 0.727<br>[0.576,0.875]        | 0.719<br>[0.562,0.875]        | 0.867<br>[0.667,1.0]        | 0.588<br>[0.333,0.833]        | 0.727<br>[0.575,0.875]        | 0.650<br>[0.429,0.857]        |
| Ensemble RF-baseline     | DF-imm<br>Clinical data | 43     | 0.678<br>[0.513,0.836]        | 0.605<br>[0.442,0.744]        | <b>0.875</b><br>[0.731,1.0] | 0.263<br>[0.071,0.467]        | 0.600<br>[0.436,0.758]        | 0.569<br>[0.448,0.684]        |
| Ensemble RF-longitudinal | DF-imm<br>Clinical data | 32     | <b>0.824</b><br>[0.658,0.953] | <b>0.750</b><br>[0.594,0.906] | 0.733<br>[0.500,0.938]      | <b>0.765</b><br>[0.533,0.947] | <b>0.733</b><br>[0.471,0.933] | <b>0.749</b><br>[0.594,0.897] |

**Supplementary Table S10** Response prediction performance comparison between longitudinal and ensemble models in the independent test set for endpoint PFS6 by evaluating AUC, ACC, SENS, SPEC, PREC and bACC, respectively. For each metric, the 95% confidence interval is shown. The highest value for each metric is highlighted in bold.

| Model                    | Features                | N test | AUC                           | ACC                           | SENS                        | SPEC                          | PREC                         | bACC                          |
|--------------------------|-------------------------|--------|-------------------------------|-------------------------------|-----------------------------|-------------------------------|------------------------------|-------------------------------|
| RF-baseline              | Clinical data           | 43     | 0.563<br>[0.392,0.735]        | 0.581<br>[0.442,0.721]        | 0.793<br>[0.636,0.929]      | 0.143<br>[0.0,0.357]          | 0.657<br>[0.5,0.811]         | 0.468<br>[0.352,0.591]        |
| RF-baseline              | DF-imm                  | 43     | 0.541<br>[0.359,0.724]        | 0.628<br>[0.488,0.767]        | 0.759<br>[0.6,0.903]        | 0.357<br>[0.118,0.6]          | 0.710<br>[0.533,0.867]       | 0.558<br>[0.405,0.711]        |
| RF-longitudinal          | Clinical data           | 32     | 0.573<br>[0.4,0.742]          | 0.531<br>[0.375,0.688]        | 0.579<br>[0.353,0.789]      | 0.462<br>[0.188,0.727]        | 0.611<br>[0.4,0.842]         | 0.52<br>[0.333,0.697]         |
| RF-longitudinal          | DF-imm                  | 32     | 0.717<br>[0.558,0.865]        | 0.750<br>[0.594,0.875]        | 0.895<br>[0.737,1.0]        | 0.538<br>[0.273,0.833]        | 0.739<br>[0.55,0.913]        | 0.717<br>[0.562,0.869]        |
| Ensemble RF-baseline     | DF-imm<br>Clinical data | 43     | 0.560<br>[0.377,0.731]        | 0.581<br>[0.442,0.721]        | 0.793<br>[0.643,0.933]      | 0.143<br>[0.0,0.364]          | 0.657<br>[0.487,0.811]       | 0.468<br>[0.36,0.59]          |
| Ensemble RF-longitudinal | DF-imm<br>Clinical data | 32     | <b>0.753</b><br>[0.549,0.931] | <b>0.813</b><br>[0.656,0.938] | <b>0.947</b><br>[0.826,1.0] | <b>0.615</b><br>[0.357,0.889] | <b>0.783</b><br>[0.609,0.95] | <b>0.781</b><br>[0.631,0.923] |

**Supplementary Table S11** Response prediction performance comparison between longitudinal and ensemble models in the independent test set for endpoint PFS9 by evaluating AUC, ACC, SENS, SPEC, PREC and bACC, respectively. For each metric, the 95% confidence interval is shown and the highest value is highlighted in bold.

### S10. Comparisons Kaplan-Meier survival curves

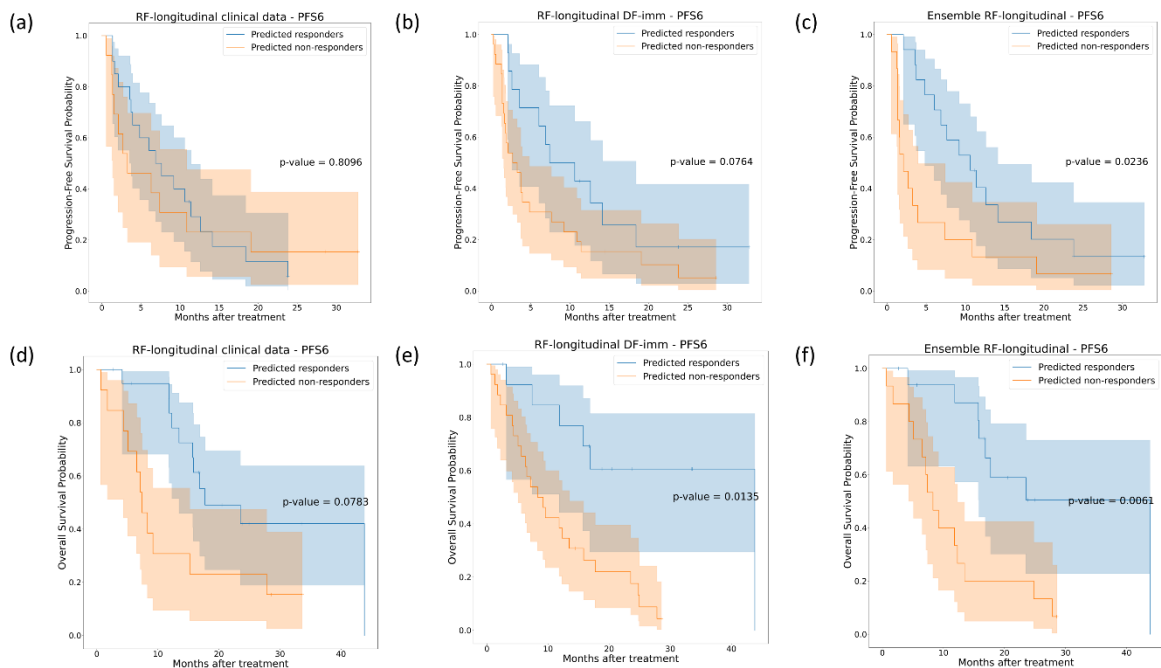

**Supplementary Figure S1** Kaplan-Meier survival curves on the independent test cohort for longitudinal RF based on clinical data ((a) and (d)), longitudinal RF with deep features ((b) and (e)) and ensemble RF ((c) and (f)) trained for endpoint PFS6, according to risk groups based on each models' predictions. The first row represents the progression-free survival Kaplan-Meier curves, while the second row represents the overall survival Kaplan-Meier curves.

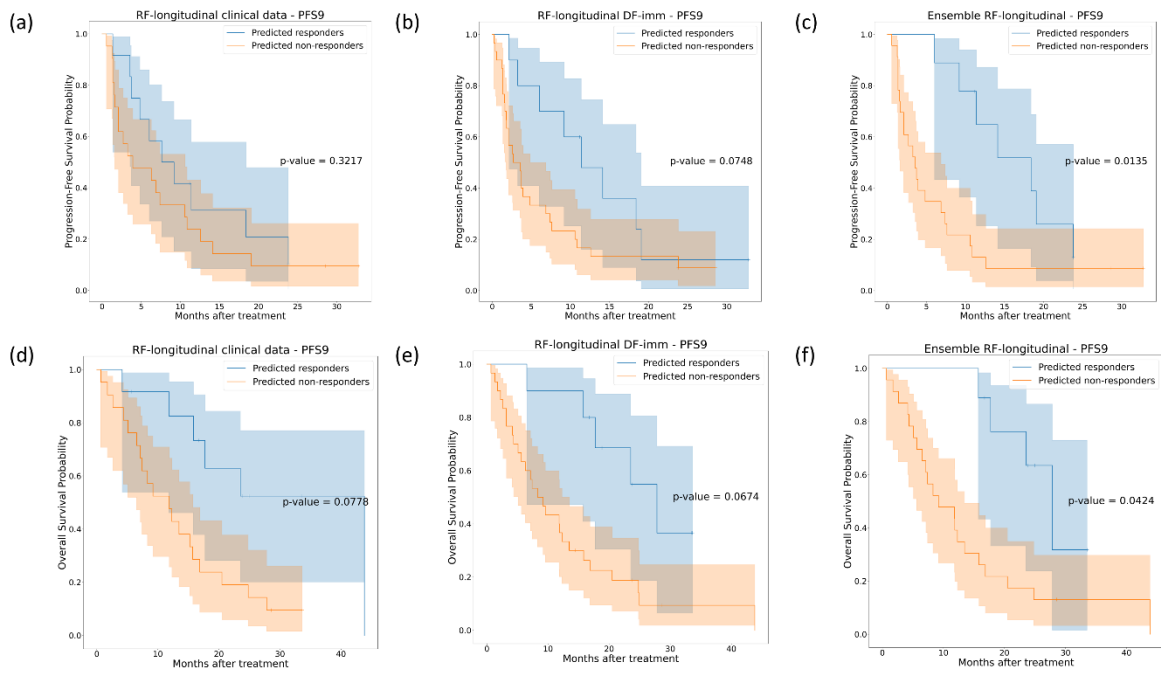

**Supplementary Figure S2** Kaplan-Meier survival curves on the independent test cohort for longitudinal RF based on clinical data ((a) and (d)), longitudinal RF with deep features ((b) and (e)) and ensemble RF ((c) and (f)) trained for endpoint PFS9, according to risk groups based on each models' predictions. The first row represents the progression-free survival Kaplan-Meier curves, while the second row represents the overall survival Kaplan-Meier curves.
